# Supplementary material for: Synthesis of block copolymers via atom transfer radical polymerization and ‘click chemistry’ grafted from pre-functionalized polypropylene surfaces using gamma irradiation
Source: Royal Society of Chemistry journal article supplement (doi:10.1039/c2py20392h), 2012-01-01
Supplement: c2py20392h.pdf [file c2py20392h.pdf]

# Synthesis of Block Copolymers via Atom Transfer Radical Polymerization and ‘Click Chemistry’ grafted from Pre-functionalized Polypropylene Surfaces using Gamma Irradiation

## Supporting Information\*

*Ollie Foster, Alexander H. Soeriyadi, Michael R. Whittaker, Thomas P. Davis, Cyrille*

*Boyer\**

*Centre for Advanced Macromolecular Design (CAMD), School of Chemical Engineering,*

*The University of New South Wales, Sydney, NSW 2052, Australia.*

*E-mail: [cboyer@unsw.edu.au](mailto:cboyer@unsw.edu.au)*

**\*Content : Figure S1-S10 and Tables 1-3.**

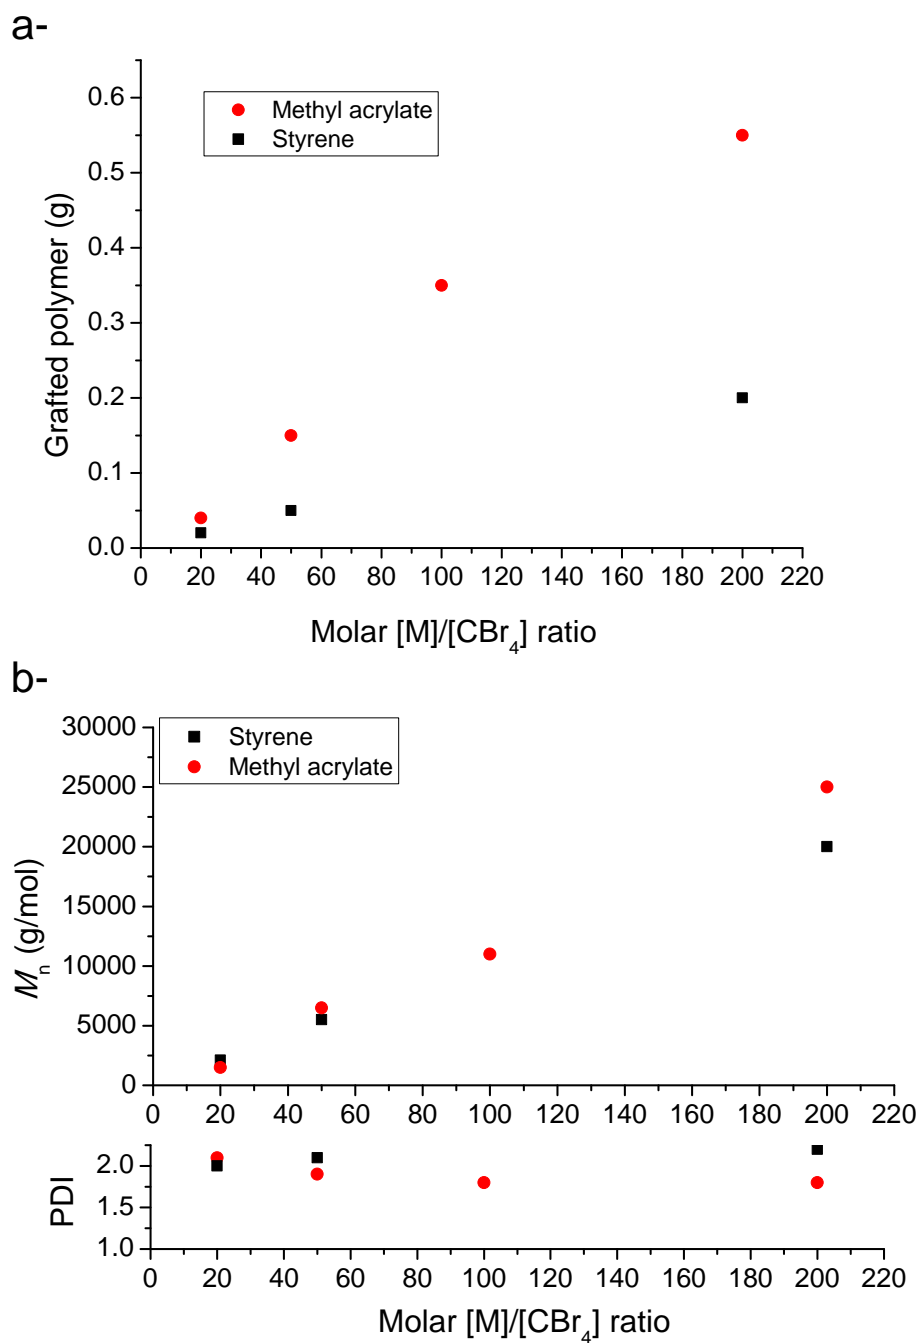

**Figure S1.** Grafted polymer PP surface initiated by Gamma irradiation of methyl acrylate and styrene in the presence of different  $[Monomer]_0/[CBr_4]_0$  ratios: a) grafted polymer weight and b) GPC analysis of free polymer in solution.

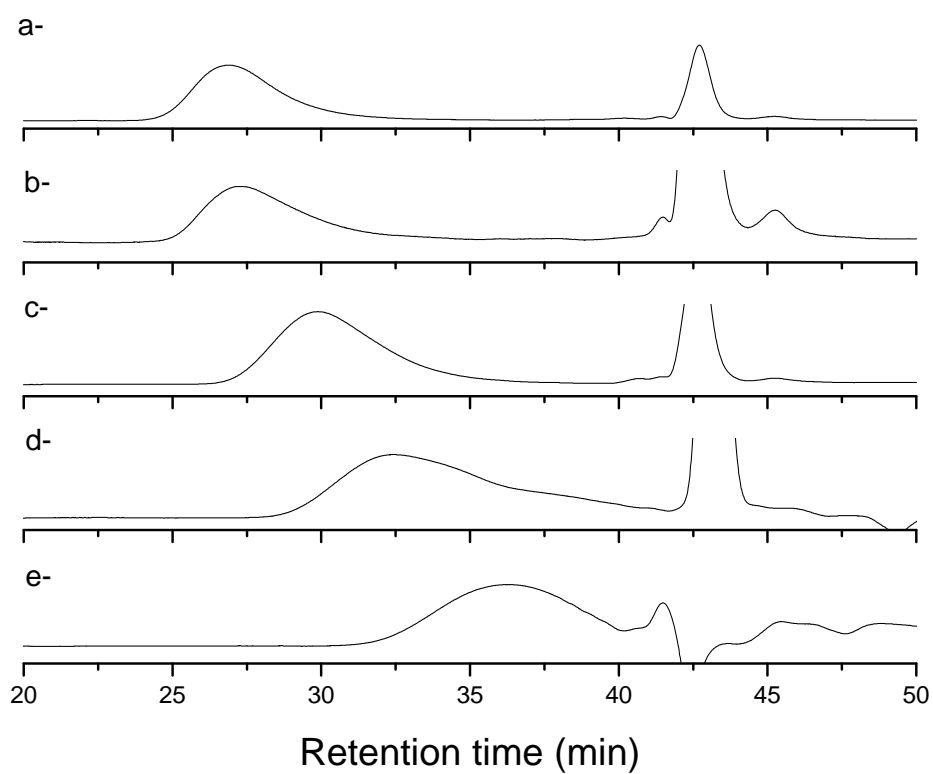

**Figure S2.** GPC traces of poly(methyl acrylate) in solution obtained using gamma irradiation of PP in the presence of methyl acrylate(MA) and transfer agent (CBr<sub>4</sub>). [MA]/[CBr<sub>4</sub>] ratio corresponds to 300/1 (a), 200/1 (b), 100/1 (c), 50/1, and 20/1 (d).

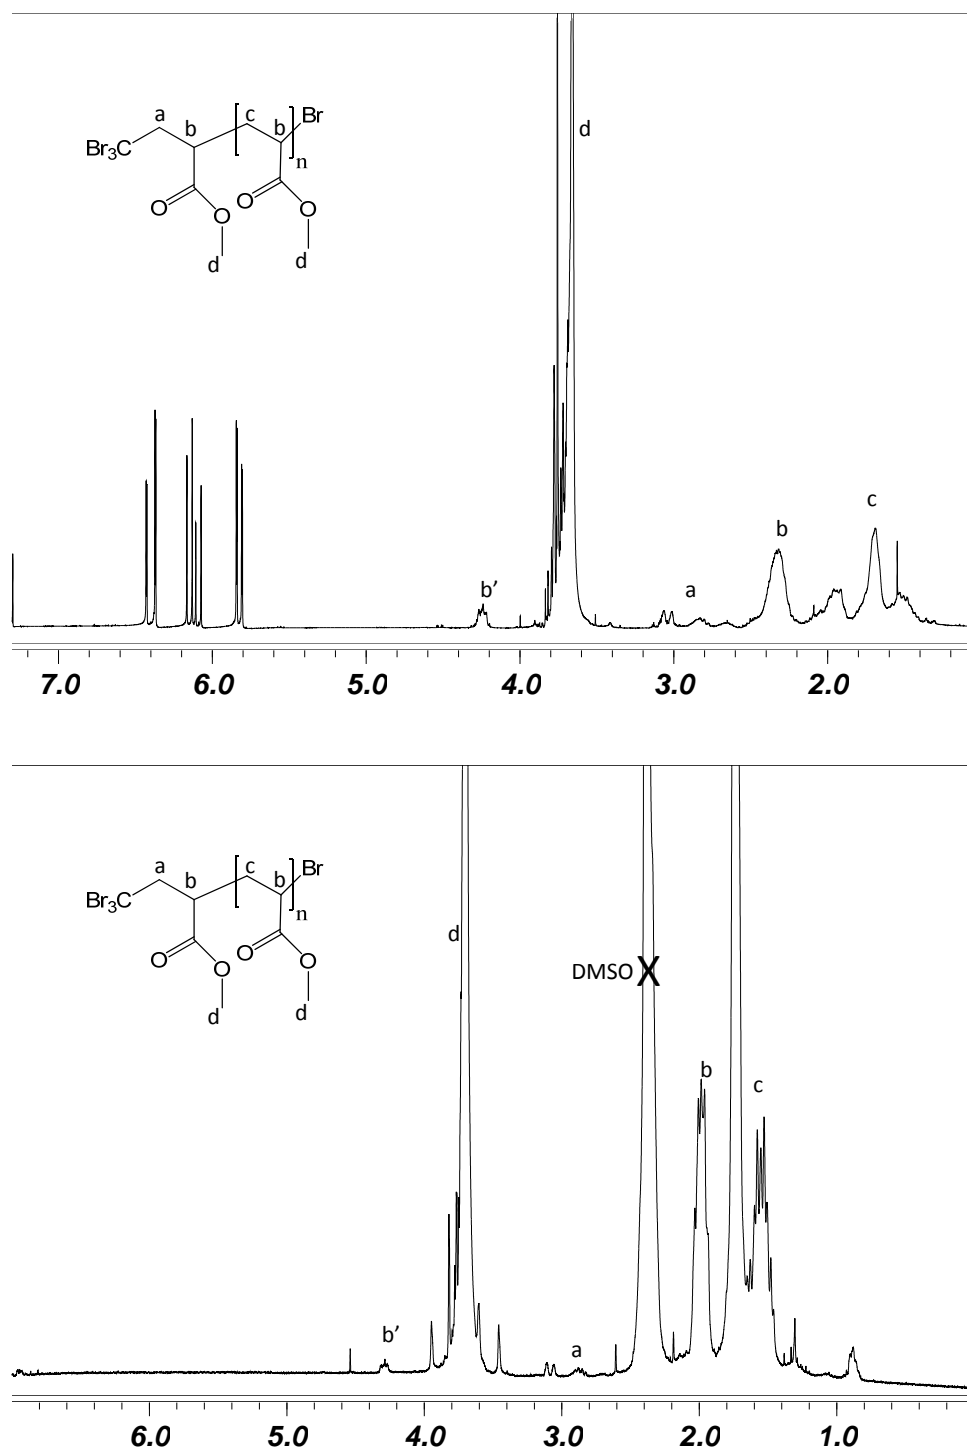

**Figure S3.** Examples of  $^1\text{H}$  NMR spectra of poly(methyl acrylate) obtained using gamma irradiation of PP in the presence of methyl acrylate (MA) and transfer agent ( $\text{CBr}_4$ ). [MA]/[ $\text{CBr}_4$ ] ratio equals to 100/1 (up) and 50/1 (bottom): up- poly(methyl acrylate) in the presence of methyl acrylate monomer; bottom- purified poly(methyl acrylate).

Note: CH in adjacent of bromine (b') appears at 4.3 ppm.

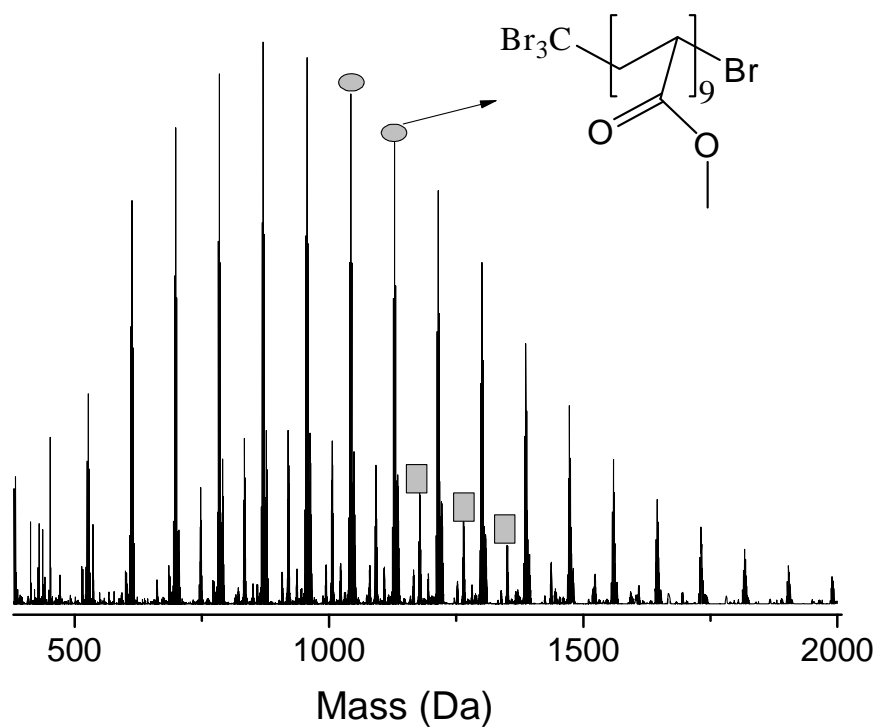

**Figure S4.** ESI-MS of poly(methyl acrylate) in solution obtained using gamma irradiation of PP in the presence of methyl acrylate (MA) and transfer agent ( $\text{CBr}_4$ ).  $[\text{MA}]/[\text{CBr}_4]$  ratio corresponds 20/1.

*Note: ESI-MS shows the distribution of expected populations, i.e.  $\text{CBr}_3\text{-PMA-Br}$  charged with sodium ( $\text{Na}^+$ ) (circle in Figure S4). Additional populations can be observed and are attributed to double charge species indicated by squares.*

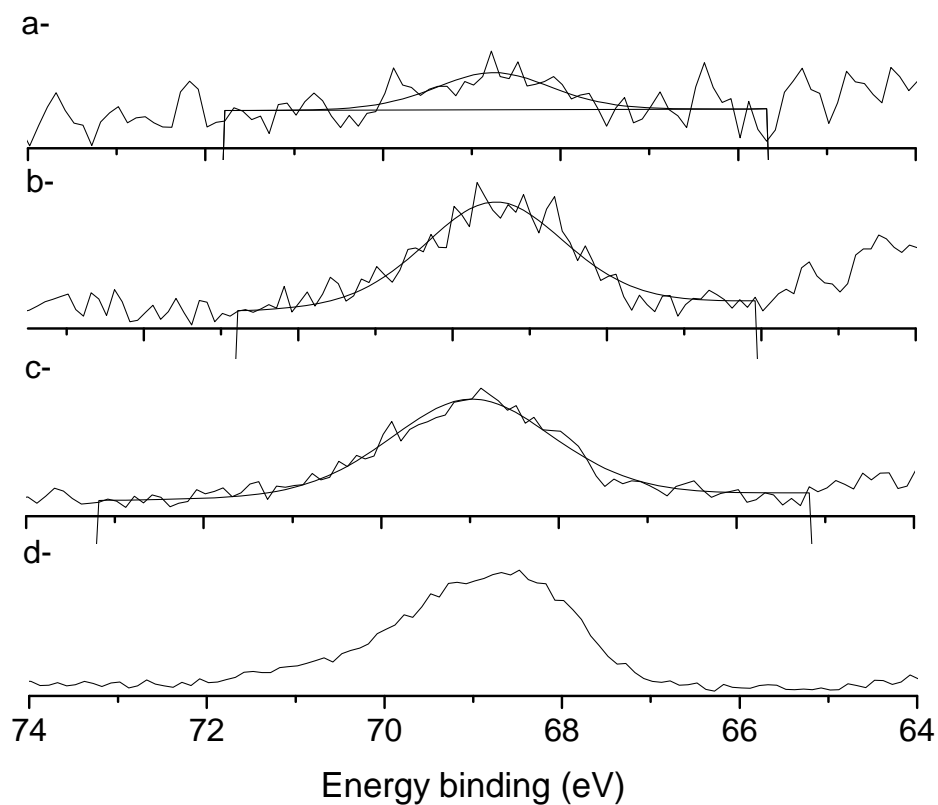

**Figure S5.** High resolution XPS spectra of Br(3d) regions of purified PP films obtained after gamma irradiation in the presence of CBr<sub>4</sub> and methyl acrylate. a- sample 1 ([M]/[CBr<sub>4</sub>] molar ratio = 200/1), b- sample 2 ([M]/[CBr<sub>4</sub>] molar ratio = 100/1), c- sample 3 ([M]/[CBr<sub>4</sub>] molar ratio = 50/1) and d- sample 4 ([M]/[CBr<sub>4</sub>] molar ratio = 20/1) of **Table 1**.

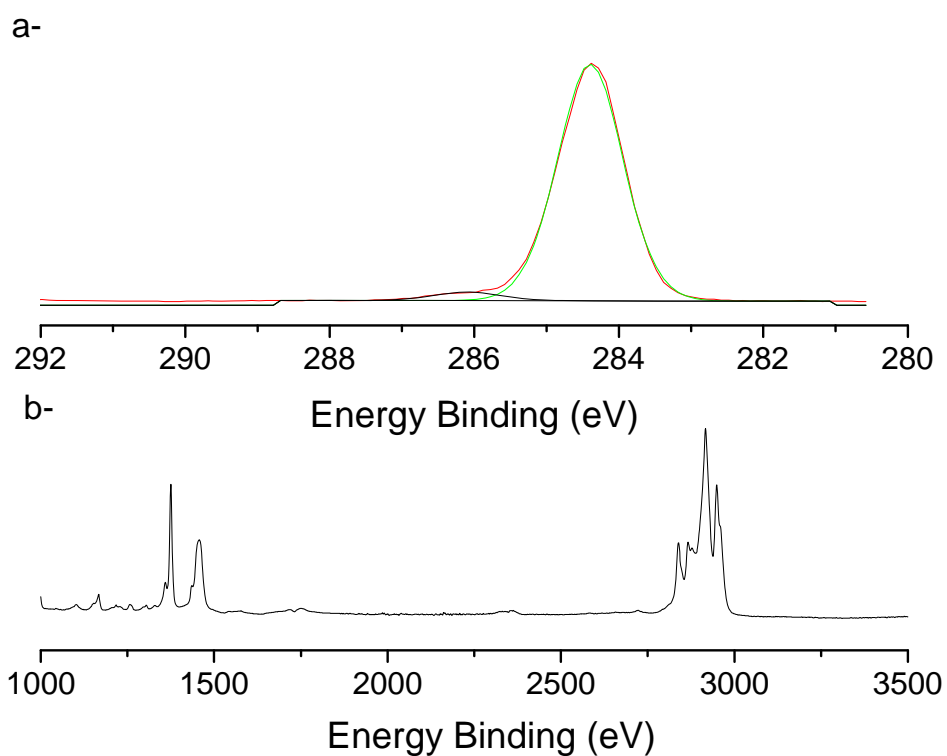

**Figure S6.** Analysis of purified PP surface after ATRP of MA in the presence of non functional PP: a- high resolution XPS spectrum of C(1s), b- ATR-FTIR spectrum of purified PP-*g*-PMA.

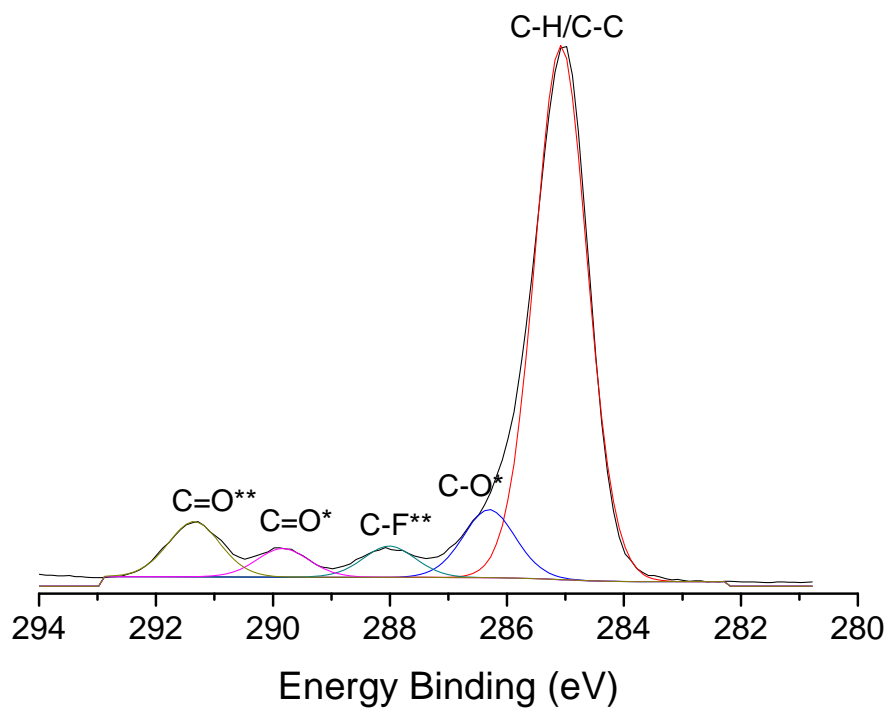

**Figure S7.** Deconvolution of high resolution XPS of purified PP-*g*-[PS-*b*-PMA-*b*-PFA] surface after ATRP of MA and then, chain extension with FA.

Note: C=O\*\* and C-F\*\* are attributed to PFA block, while C=O\* and C-O\* correspond to MA block.

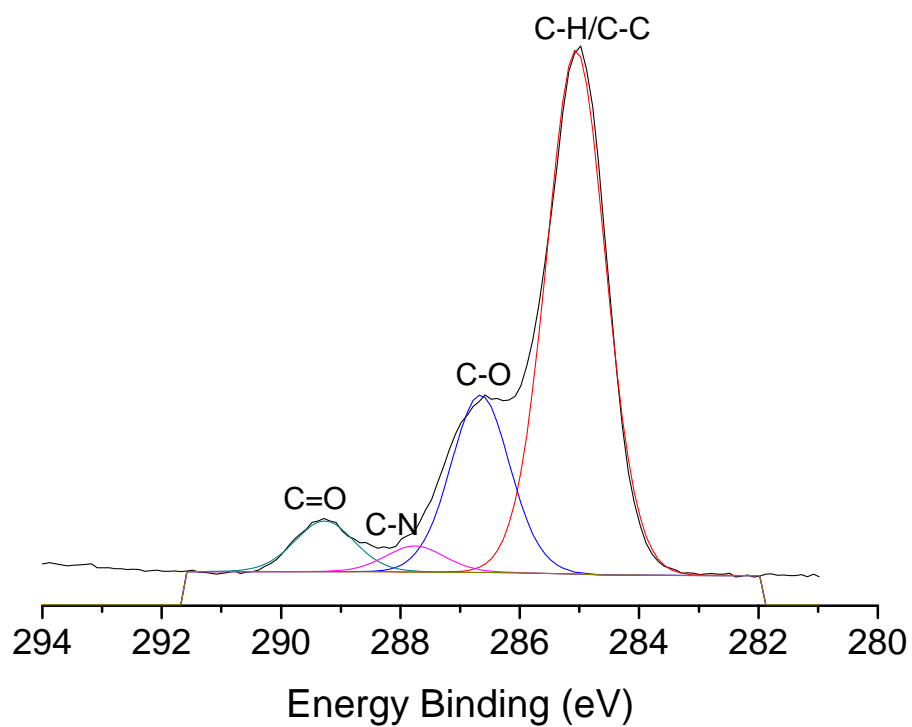

**Figure S8.** Deconvolution of C1(s) high resolution XPS of purified PP-*g*-[PS-*b*-PMA-*b*-PDMAEA] surface after ATRP of MA, and then, chain extension with DMAEA.

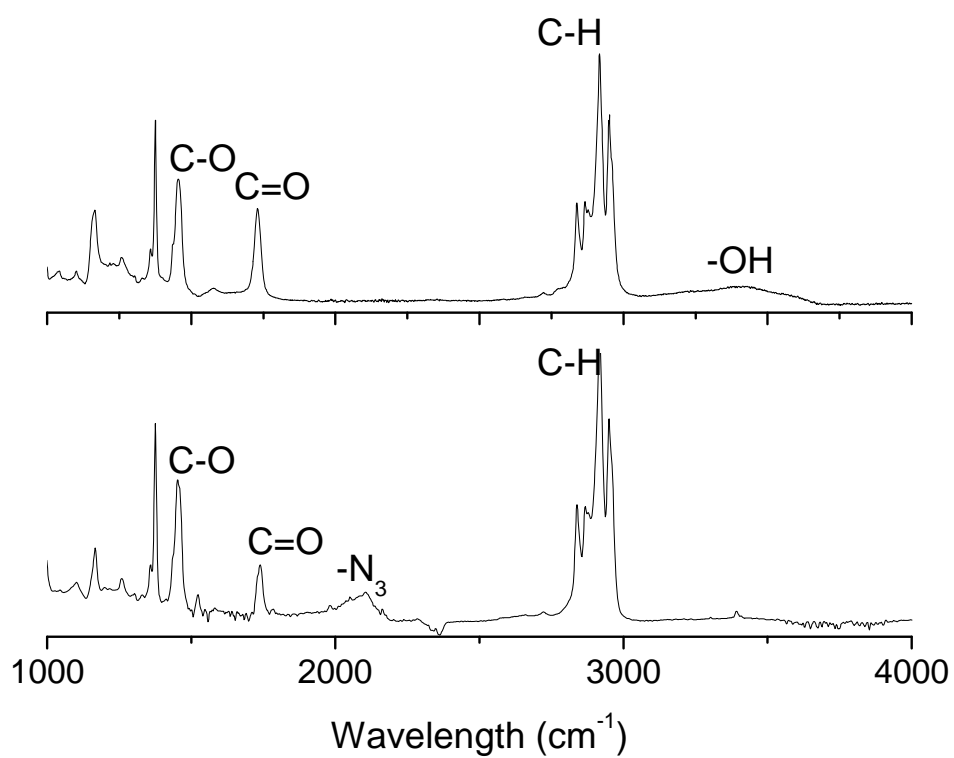

**Figure S9.** ATR-FTIR spectra of (up) purified PP-g-PMA-N<sub>3</sub> after click chemistry in the presence of propargyl alcohol and (bottom) purified PP-g-PMA-N<sub>3</sub> before click chemistry.

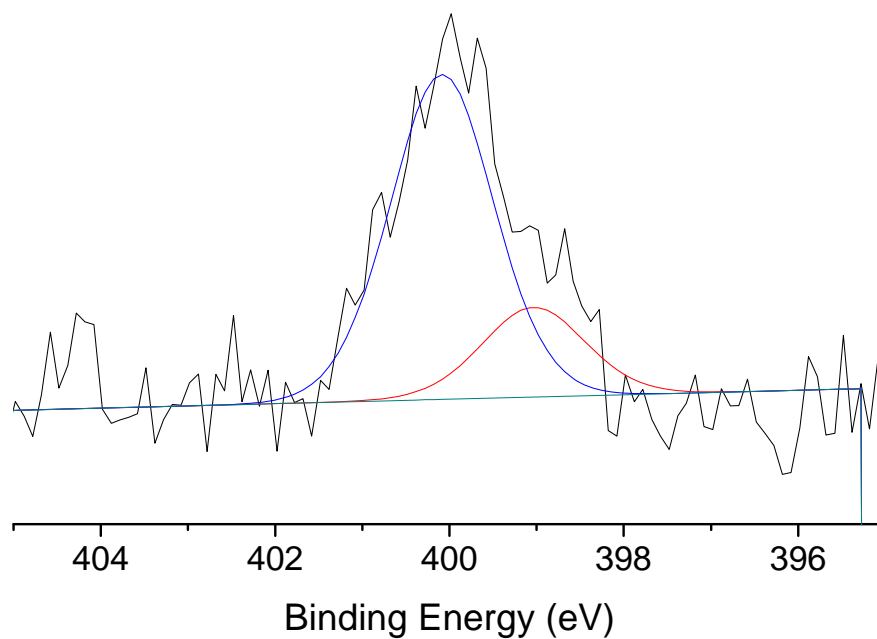

**Figure S10.** High resolution XPS spectrum of N1(s) after nucleophilic substitution of PP-*g*-PMA-Br with sodium azide.

Note: Before reaction, Nitrogen signal was not detectable.

| Samples # | Transfer<br>agents (TA) | Monomers | Composition by XPS |     |      |   |                   |
|-----------|-------------------------|----------|--------------------|-----|------|---|-------------------|
|           |                         |          | C                  | O   | Br   | I | Other<br>elements |
| PP        | -                       | -        | 75                 | 20  | 0    | 0 | 5                 |
| 1         | CBr <sub>4</sub>        | MA       | 55                 | 45  | 0.07 | 0 | 0                 |
| 2         | CBr <sub>4</sub>        | MA       | 62                 | 36  | 0.21 | 0 | 2                 |
| 3         | CBr <sub>4</sub>        | MA       | 68                 | 31  | 0.49 | 0 | 1                 |
| 4         | CBr <sub>4</sub>        | MA       | 69                 | 29  | 0.89 | 0 | 1                 |
| 5         | CBr <sub>4</sub>        | ST       | 88                 | 09* | 0.12 | 0 | 2                 |
| 6         | CBr <sub>4</sub>        | ST       | 90                 | 07* | 0.24 | 0 | 3                 |
| 7         | CBr <sub>4</sub>        | ST       | 90                 | 09* | 0.46 | 0 | 1                 |
| 8         | CBr <sub>4</sub>        | MMA      | 62                 | 35  | 0.84 | 0 | 3                 |

**Table S1.** Elemental analysis obtained by XPS for different PP films after gamma irradiation in the presence of monomers and carbon tetrabromide (CBr<sub>4</sub>).

Note \* oxygen was detected on PP-g-PST attributed to the physio-sorption of O<sub>2</sub>.

| Samples # | Transfer agents (TA) | Monomers | Composition by XPS |    |      |      |                |
|-----------|----------------------|----------|--------------------|----|------|------|----------------|
|           |                      |          | C                  | O  | Br   | I    | Other elements |
| PP        | -                    | -        | 75                 | 20 | 0    | 0    | 5              |
| 9         | CuBr <sub>2</sub>    | MA       | 70                 | 24 | 1.22 | 0    | 5              |
| 10        | CuBr <sub>2</sub>    | MA       | 71                 | 25 | 1.23 | 0    | 4              |
| 11        | CuBr <sub>2</sub>    | ST       | 81                 | 19 | 0.83 | 0    | 2              |
| 12        | CuBr <sub>2</sub>    | ST       | nd                 | nd | nd   | nd   | nd             |
| 13        | CuBr <sub>2</sub>    | MMA      | 73                 | 25 | 0.95 | 0    | 1              |
| 14        | CuBr <sub>2</sub>    | MMA      | 71                 | 28 | 0.89 | 0    | 3              |
| 15        | I <sub>2</sub>       | MA       | 79                 | 19 | 0    | 0.91 | 1              |
| 16        | I <sub>2</sub>       | MA       | 72                 | 24 | 0    | 0.88 | 1              |
| 17        | I <sub>2</sub>       | ST       | 78                 | 20 | 0    | 1.12 | 1              |

**Table S2.** Elemental analysis obtained by XPS for different PP films after gamma irradiation in the presence of monomers and copper bromide or iodine.

Note \* oxygen was detected on PP-g-PST attributed to the physio-sorption of O<sub>2</sub>.

| Samples #               | Click chemistry   | Composition by XPS |    |      |   |      |      |      |                |
|-------------------------|-------------------|--------------------|----|------|---|------|------|------|----------------|
|                         |                   | C                  | O  | Br   | I | Si   | N    | S    | Other elements |
| PP-g-PMA-Br             | -                 | 68                 | 31 | 0.49 | 0 | 0    | 0    | 0    | 1              |
| PP-g-PMA-Br             | POSS-thiol        | 65                 | 30 | 0    | 0 | 3.85 | 0    | 0.35 | 1              |
| PP-g-PMA-Br             | 2-AET/HCl         | 67                 | 30 | 0    | 0 | 0    | 0.35 | 0.43 | 1              |
| PP-g-PMA-Br             | Sodium Azide      | 68                 | 30 | 0    | 0 | 0    | 0.94 | 0    | 1              |
| PP-g-PMA-N <sub>3</sub> | Propargyl alcohol | 67                 | 30 | 0    | 0 | 0    | 0.88 | 0    | 2              |

**Table S3.** Elemental analysis obtained by XPS after different click chemistry reactions.
